# Supplementary material
Source: PubMed Central journal article supplement (PMC9931141)
Supplement: NIHMS1868283-supplement-Supplementary_Information.pdf [file NIHMS1868283-supplement-Supplementary_Information.pdf]

# Supporting Information

**Title: CandyCollect: At-home saliva sampling for respiratory pathogen capture**

Ulri N. Lee,<sup>\*,1</sup> Xiaojing Su,<sup>\*,1</sup> Danielle L. Hieber,<sup>1</sup> Wan-chen Tu,<sup>1</sup> Anika M. McManamen,<sup>1</sup> Meg G. Takezawa,<sup>1</sup> Tung Ching Chan,<sup>1</sup> Grant W. Hassan,<sup>1</sup> Karen N. Adams,<sup>2</sup> Ellen R. Wald,<sup>3,4</sup> Gregory P. DeMuri,<sup>3,4</sup> Erwin Berthier,<sup>1</sup> Ashleigh B. Theberge<sup>#,1,5</sup> and Sanitta Thongpang,<sup>#,1,6</sup>

<sup>1</sup>Department of Chemistry, University of Washington, Seattle, WA, USA

<sup>2</sup>Institute of Translational Health Sciences, School of Medicine, University of Washington, Seattle, WA, USA

<sup>3</sup>University of Wisconsin Hospital and Clinics, Madison, WI, USA

<sup>4</sup>Department of Pediatrics, University of Wisconsin School of Medicine and Public Health, Madison, WI, USA

<sup>5</sup>Department of Urology, School of Medicine, University of Washington, Seattle, WA, USA

<sup>6</sup>Department of Biomedical Engineering, Faculty of Engineering, Mahidol University, Nakorn Pathom, Thailand

**\*These authors contributed equally to this work.**

**#Co-corresponding authors: [sanitta@uw.edu](mailto:sanitta@uw.edu), [abt1@uw.edu](mailto:abt1@uw.edu)**

**Figure S1:** Schematic of device dimensions.

**Figure S2:** Qualification of integrated density.

**Table S1:** Mass, diameter, thickness, and dissolving time of CandyCollects in Figure 4A.

**Table S2:** Mass, diameter, thickness, and dissolving time of CandyCollects in Figure 4B.

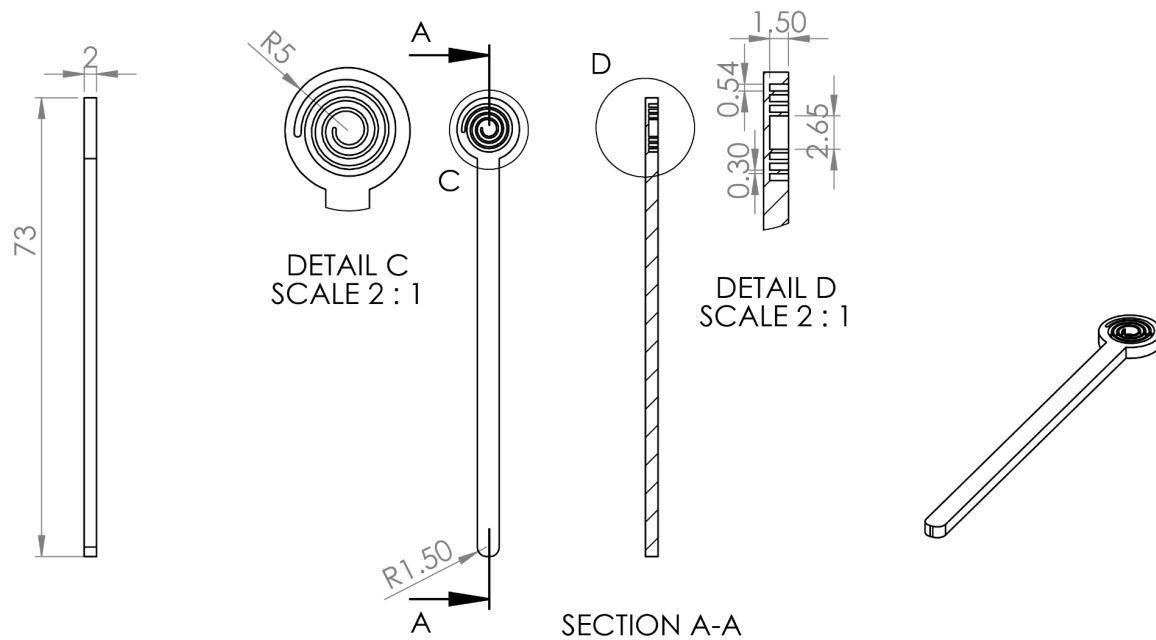

**Figure S1.** Schematic diagrams illustrating the dimensions, in mm, of the CandyCollect milled stick. CAD file also included.

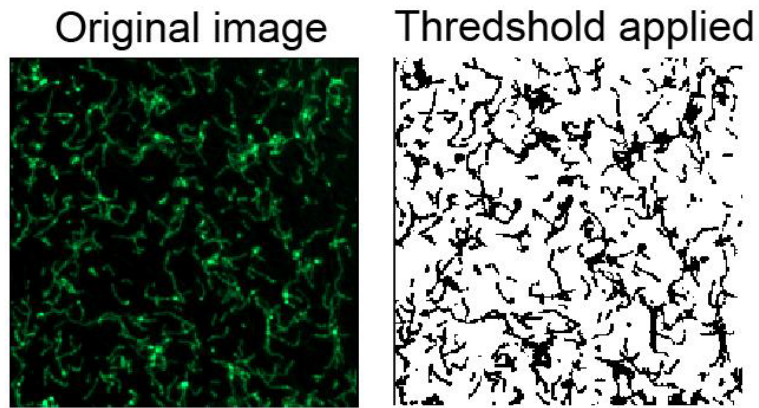

**Figure S2.** Qualification of integrated density. Image process before and after thredshold applied in one given region of interest (ROI).

Table S1. Mass, diameter, thickness, and dissolving time of CandyCollects in Figure 4A.

| Lollipop | Mass (g) | Diameter (mm) | Thickness (mm) | Time (min) |
|----------|----------|---------------|----------------|------------|
| A1       | 0.04     | n/a*          | n/a            | 0.75       |
| A2       | 0.04     | n/a           | n/a            | 0.50       |
| A3       | 0.04     | n/a           | n/a            | 0.65       |
| B1       | 0.08     | n/a           | n/a            | 1.03       |
| B2       | 0.08     | n/a           | n/a            | 0.83       |
| B3       | 0.08     | n/a           | n/a            | 0.82       |
| C1       | 4.70     | 27.12         | 4.52           | 6.67       |
| C2       | 4.16     | 27.12         | 4.52           | 5.98       |
| C3       | 4.09     | 27.12         | 4.52           | 5.67       |
| D1       | 4.06     | 23.00         | 6.46           | 8.33       |
| D2       | 4.12     | 23.00         | 6.46           | 7.67       |
| D3       | 4.27     | 23.00         | 6.46           | 7.08       |
| E1       | 7.44     | 30.00         | 7.60           | 10.28      |
| E2       | 7.62     | 30.00         | 7.60           | 9.55       |
| E3       | 6.32     | 30.00         | 7.60           | 9.63       |
| F1       | 6.92     | 23.00         | 12.92          | 14.32      |
| F2       | 7.45     | 23.00         | 12.92          | 13.50      |
| F3       | 7.53     | 23.00         | 12.92          | 15.67      |

\*Note: CandyCollects A1-B3 did not have measurable diameter and thickness because a mold was not used to apply the candy. Instead a small drop of isomalt was applied and allowed to form a thin layer on the stick. The diameter of the round area on the stick is 1 cm and the thickness is 2 mm.

Table S2. Mass, diameter, thickness, and dissolving time of CandyCollects in Figure 4B.

| Participant | Mass (g) | Diameter (mm) | Thickness (mm) | Time (min) |
|-------------|----------|---------------|----------------|------------|
| 1           | 0.96     | 16            | 4              | 2.08       |
|             | 1.14     | 16            | 4              | 2.43       |
|             | 1.07     | 16            | 4              | 2.40       |
| 2           | 0.93     | 16            | 4              | 3.42       |
|             | 1.12     | 16            | 4              | 3.68       |
|             | 0.97     | 16            | 4              | 1.97       |
| 3           | 1.02     | 16            | 4              | 4.77       |
|             | 0.88     | 16            | 4              | 3.80       |
|             | 1.07     | 16            | 4              | 4.43       |
| 4           | 1.07     | 16            | 4              | 5.28       |
|             | 0.88     | 16            | 4              | 4.50       |
|             | 1        | 16            | 4              | 4.22       |
| 5           | 1.06     | 16            | 4              | 2.83       |
|             | 1.11     | 16            | 4              | 2.58       |
|             | 1.09     | 16            | 4              | 2.45       |
| 6           | 0.98     | 16            | 4              | 2.72       |
|             | 1.15     | 16            | 4              | 6.93       |
|             | 0.97     | 16            | 4              | 4.62       |
| 7           | 1.07     | 16            | 4              | 2.35       |
|             | 1        | 16            | 4              | 3.02       |
|             | 1.09     | 16            | 4              | 3.13       |
| 8           | 1.12     | 16            | 4              | 2.50       |
|             | 1        | 16            | 4              | 1.98       |
|             | 0.96     | 16            | 4              | 2.08       |
| 9           | 1.13     | 16            | 4              | 2.55       |

|    |      |    |   |      |
|----|------|----|---|------|
|    | 1.03 | 16 | 4 | 2.27 |
|    | 0.95 | 16 | 4 | 2.00 |
| 10 | 1.01 | 16 | 4 | 6.27 |
|    | 0.83 | 16 | 4 | 5.98 |
|    | 0.96 | 16 | 4 | 5.37 |
| 11 | 0.92 | 16 | 4 | 1.25 |
|    | 1.04 | 16 | 4 | 1.33 |
|    | 1.05 | 16 | 4 | 1.57 |
| 12 | 0.99 | 16 | 4 | 2.70 |
|    | 1.02 | 16 | 4 | 2.53 |
|    | 0.98 | 16 | 4 | 2.27 |
| 13 | 1.08 | 16 | 4 | 4.33 |
|    | 0.95 | 16 | 4 | 4.07 |
|    | 0.96 | 16 | 4 | 4.57 |
| 14 | 0.92 | 16 | 4 | 2.68 |
|    | 1.01 | 16 | 4 | 2.60 |
|    | 0.97 | 16 | 4 | 3.03 |
| 15 | 0.97 | 16 | 4 | 6.62 |
|    | 1.02 | 16 | 4 | 7.70 |
|    | 0.94 | 16 | 4 | 5.20 |
| 16 | 0.93 | 16 | 4 | 3.18 |
|    | 0.95 | 16 | 4 | 3.13 |
|    | 0.95 | 16 | 4 | 3.03 |
| 17 | 1.01 | 16 | 4 | 4.62 |
|    | 1.04 | 16 | 4 | 4.47 |
|    | 0.95 | 16 | 4 | 3.63 |

| <i>S. pyogenes</i> conc.<br>(CFU/ml) | Cq*                     | Mean Cq | DNA content*<br>(ng)                                                       | Mean DNA<br>content (ng) |
|--------------------------------------|-------------------------|---------|----------------------------------------------------------------------------|--------------------------|
| 0 (Control)                          | ND<br>ND<br>ND          |         |                                                                            |                          |
| 1x10 <sup>3</sup>                    | ND<br>38.51<br>37.58    | 38.04   | ND<br>3.38 x10 <sup>-5</sup><br>6.08 x10 <sup>-5</sup>                     | 4.73x10 <sup>-5</sup>    |
| 1x10 <sup>4</sup>                    | 35.24<br>34.40<br>34.64 | 34.76   | 2.66 x10 <sup>-4</sup><br>4.50 x10 <sup>-4</sup><br>3.88 x10 <sup>-5</sup> | 3.68 x10 <sup>-4</sup>   |
| 1x10 <sup>5</sup>                    | 31.34<br>31.25<br>31.12 | 31.24   | 3.10 x10 <sup>-3</sup><br>3.28 x10 <sup>-3</sup><br>3.57 x10 <sup>-3</sup> | 3.32x10 <sup>-3</sup>    |
| 1x10 <sup>7</sup>                    | 24.22<br>24.32<br>24.36 | 24.30   | 2.75 x10 <sup>-1</sup><br>2.57 x10 <sup>-1</sup><br>2.51 x10 <sup>-1</sup> | 2.61x10 <sup>-1</sup>    |
| 1x10 <sup>9</sup>                    | 16.44<br>16.77<br>16.38 | 16.53   | 3.69 x10 <sup>1</sup><br>3.01 x10 <sup>1</sup><br>3.84 x10 <sup>1</sup>    | 3.51x10 <sup>1</sup>     |

\* The 3 tabulated values are for 3 CandyCollect devices; extracts from each device were measured in duplicate using qPCR, and the tabulated value is the mean of the technical duplicates.

Note: The lowest measurable quantity of DNA is 50 femtogram as determined by qPCR standards"

- ask xsu7 what to fill in for xxx's.

Also, it think it is helpful to include the standard curve in the SI

I think the  $10^3$  only has two dots on your graph, which might be because the third replicate was not detected, that would need to be included in the table as "not detected" and a note that the Cq value was higher than the lowest standard (if that's the case) or just simply not detected (i'm not sure which one it was)

Also, instead of "Mean Cq", I suggest to write "Cq\*" and leave the \* with a note "The 3 tabulated values are for 3 CandyCollect devices; extracts from each device were measured in duplicate using qPCR, and the tabulated value is the mean of the technical duplicates." Then rename Average Cq to "Mean Cq" and put a note there that that is the mean of 3 devices. And do the same for the other two columns.
